# Supplementary material
Source: MDPI journal article supplement (https://www.mdpi.com/2077-0472/14/5/771)
Supplement: s1 [file s1]

**Table S1.** Physicochemical properties of StBTB proteins.

| <b>Gene name</b> | <b>Molecular weight</b> | <b>Isoelectric point</b> | <b>Instability index</b> | <b>Aliphatic index</b> | <b>GRAVY</b> |
|------------------|-------------------------|--------------------------|--------------------------|------------------------|--------------|
| <b>StBTB1</b>    | 44974.76                | 6.07                     | 40.55                    | 81.33                  | -0.291       |
| <b>StBTB2</b>    | 94892.40                | 5.52                     | 53.02                    | 75.53                  | -0.352       |
| <b>StBTB3</b>    | 45182.59                | 6.02                     | 35.53                    | 90.79                  | -0.111       |
| <b>StBTB4</b>    | 64855.17                | 6.04                     | 49.93                    | 89.53                  | -0.44        |
| <b>StBTB5</b>    | 62965.09                | 5.18                     | 55.20                    | 74.09                  | -0.387       |
| <b>StBTB6</b>    | 63575.64                | 8.98                     | 40.07                    | 96.19                  | -0.24        |
| <b>StBTB7</b>    | 69014.65                | 6.78                     | 34.07                    | 85.99                  | -0.303       |
| <b>StBTB8</b>    | 69867.04                | 5.74                     | 45.44                    | 87.14                  | -0.284       |
| <b>StBTB9</b>    | 31936.05                | 5.31                     | 55.40                    | 77.96                  | -0.564       |
| <b>StBTB10</b>   | 47426.68                | 4.97                     | 39.06                    | 104.39                 | 0.045        |
| <b>StBTB11</b>   | 64360.48                | 6.03                     | 37.36                    | 89.12                  | -0.213       |
| <b>StBTB12</b>   | 54586.29                | 8.34                     | 54.18                    | 91.91                  | -0.3         |
| <b>StBTB13</b>   | 43108.04                | 9.32                     | 53.60                    | 78.41                  | -0.433       |
| <b>StBTB14</b>   | 68636.15                | 6.46                     | 45.74                    | 84.44                  | -0.343       |
| <b>StBTB15</b>   | 66610.58                | 6.56                     | 39.93                    | 92.95                  | -0.224       |
| <b>StBTB16</b>   | 18087.76                | 4.99                     | 37.56                    | 99.88                  | 0.119        |
| <b>StBTB17</b>   | 70094.86                | 7.50                     | 44.78                    | 86.17                  | -0.32        |
| <b>StBTB18</b>   | 39521.12                | 9.18                     | 61.43                    | 84.75                  | -0.43        |
| <b>StBTB19</b>   | 50646.89                | 6.03                     | 50.55                    | 94.32                  | -0.116       |
| <b>StBTB20</b>   | 92044.17                | 5.30                     | 43.25                    | 89.29                  | -0.118       |
| <b>StBTB21</b>   | 55575.89                | 8.18                     | 51.19                    | 87.15                  | -0.458       |
| <b>StBTB22</b>   | 29300.84                | 9.04                     | 21.89                    | 93.16                  | -0.171       |
| <b>StBTB23</b>   | 37676.95                | 5.64                     | 38.52                    | 83.18                  | -0.151       |
| <b>StBTB24</b>   | 67920.43                | 6.67                     | 51.03                    | 87.91                  | -0.34        |
| <b>StBTB25</b>   | 31083.71                | 5.59                     | 33.57                    | 94.44                  | -0.132       |
| <b>StBTB26</b>   | 39993.71                | 9.23                     | 62.06                    | 90.23                  | -0.318       |
| <b>StBTB27</b>   | 40831.39                | 8.81                     | 61.42                    | 84.64                  | -0.473       |
| <b>StBTB28</b>   | 65199.54                | 6.52                     | 48.32                    | 89.86                  | -0.48        |
| <b>StBTB29</b>   | 59887.95                | 6.37                     | 44.23                    | 113.48                 | 0.125        |
| <b>StBTB30</b>   | 16648.92                | 4.62                     | 29.01                    | 88.70                  | -0.055       |
| <b>StBTB31</b>   | 69593.25                | 6.46                     | 43.54                    | 91.50                  | -0.208       |
| <b>StBTB32</b>   | 64374.17                | 7.17                     | 33.72                    | 94.69                  | -0.137       |
| <b>StBTB33</b>   | 64579.71                | 5.66                     | 44.60                    | 92.42                  | -0.345       |
| <b>StBTB34</b>   | 78154.78                | 8.39                     | 55.12                    | 90.52                  | -0.286       |
| <b>StBTB35</b>   | 65471.59                | 4.84                     | 50.44                    | 89.64                  | -0.268       |
| <b>StBTB36</b>   | 37372.73                | 5.65                     | 41.26                    | 96.43                  | -0.179       |
| <b>StBTB37</b>   | 69021.61                | 8.92                     | 42.21                    | 92.07                  | -0.256       |
| <b>StBTB38</b>   | 45248.57                | 8.89                     | 48.90                    | 91.14                  | -0.124       |
| <b>StBTB39</b>   | 59327.17                | 5.17                     | 50.07                    | 81.95                  | -0.311       |
| <b>StBTB40</b>   | 52632.78                | 5.94                     | 42.77                    | 95.19                  | -0.027       |
| <b>StBTB41</b>   | 50526.22                | 5.35                     | 47.63                    | 94.65                  | -0.03        |
| <b>StBTB42</b>   | 66892.56                | 5.48                     | 45.94                    | 88.80                  | -0.218       |
| <b>StBTB43</b>   | 64675.52                | 5.86                     | 42.78                    | 96.31                  | -0.108       |

|                |          |      |       |        |        |
|----------------|----------|------|-------|--------|--------|
| <b>StBTB44</b> | 68584.44 | 6.64 | 46.67 | 90.43  | -0.288 |
| <b>StBTB45</b> | 78339.60 | 5.86 | 47.84 | 104.31 | -0.131 |
| <b>StBTB46</b> | 45580.73 | 5.93 | 31.96 | 83.26  | -0.173 |
| <b>StBTB47</b> | 70614.17 | 9.06 | 46.79 | 97.52  | -0.245 |
| <b>StBTB48</b> | 84641.60 | 5.86 | 51.58 | 102.04 | 0.027  |
| <b>StBTB49</b> | 62567.13 | 5.40 | 50.57 | 77.79  | -0.291 |
| <b>StBTB50</b> | 86709.85 | 6.49 | 37.45 | 86.37  | -0.228 |
| <b>StBTB51</b> | 68593.97 | 5.50 | 43.43 | 84.41  | -0.327 |
| <b>StBTB52</b> | 53415.76 | 6.14 | 52.27 | 91.48  | -0.199 |
| <b>StBTB53</b> | 54288.74 | 6.28 | 54.16 | 90.35  | -0.234 |
| <b>StBTB54</b> | 38063.64 | 5.73 | 52.24 | 92.20  | -0.283 |
| <b>StBTB55</b> | 44966.77 | 5.66 | 35.64 | 82.48  | -0.218 |
| <b>StBTB56</b> | 62366.91 | 5.23 | 45.69 | 80.00  | -0.202 |
| <b>StBTB57</b> | 29939.41 | 6.55 | 50.90 | 96.29  | -0.205 |

**Table S2.** Secondary structure composition of StBTB proteins.

|                | <b>Alpha helix</b> | <b>Extended strand</b> | <b>Beta turn</b> | <b>Random coil</b> |
|----------------|--------------------|------------------------|------------------|--------------------|
| <b>StBTB1</b>  | 38.77%             | 16.54%                 | 4.44%            | 40.25%             |
| <b>StBTB2</b>  | 30.40%             | 15.14%                 | 5.90%            | 48.55%             |
| <b>StBTB3</b>  | 40.54%             | 14.50%                 | 5.41%            | 39.56%             |
| <b>StBTB4</b>  | 59.41%             | 4.70%                  | 1.92%            | 33.97%             |
| <b>StBTB5</b>  | 42.75%             | 15.04%                 | 2.36%            | 39.86%             |
| <b>StBTB6</b>  | 57.94%             | 8.12%                  | 2.53%            | 31.41%             |
| <b>StBTB7</b>  | 51.12%             | 6.55%                  | 2.40%            | 39.94%             |
| <b>StBTB8</b>  | 52.15%             | 6.20%                  | 2.70%            | 38.95%             |
| <b>StBTB9</b>  | 57.71%             | 7.53%                  | 1.43%            | 33.33%             |
| <b>StBTB10</b> | 59.43%             | 7.08%                  | 2.59%            | 30.90%             |
| <b>StBTB11</b> | 53.18%             | 6.37%                  | 3.96%            | 36.49%             |
| <b>StBTB12</b> | 52.46%             | 7.17%                  | 2.25%            | 38.11%             |
| <b>StBTB13</b> | 55.82%             | 5.03%                  | 3.44%            | 35.71%             |
| <b>StBTB14</b> | 51.71%             | 5.06%                  | 2.28%            | 40.95%             |
| <b>StBTB15</b> | 57.21%             | 5.03%                  | 1.85%            | 35.91%             |
| <b>StBTB16</b> | 59.04%             | 13.86%                 | 4.82%            | 22.29%             |
| <b>StBTB17</b> | 51.67%             | 6.86%                  | 2.55%            | 38.92%             |
| <b>StBTB18</b> | 62.32%             | 4.64%                  | 2.90%            | 30.14%             |
| <b>StBTB19</b> | 47.51%             | 7.81%                  | 5.42%            | 39.26%             |
| <b>StBTB20</b> | 35.20%             | 20.65%                 | 7.46%            | 36.69%             |
| <b>StBTB21</b> | 58.21%             | 3.53%                  | 2.29%            | 35.97%             |
| <b>StBTB22</b> | 56.77%             | 7.14%                  | 4.14%            | 31.95%             |
| <b>StBTB23</b> | 38.82%             | 14.12%                 | 5.29%            | 41.76%             |
| <b>StBTB24</b> | 56.26%             | 6.68%                  | 2.34%            | 34.72%             |

|                |        |        |       |        |
|----------------|--------|--------|-------|--------|
| <b>StBTB25</b> | 55.56% | 8.96%  | 3.58% | 31.90% |
| <b>StBTB26</b> | 62.46% | 4.01%  | 2.87% | 30.66% |
| <b>StBTB27</b> | 61.32% | 4.30%  | 2.01% | 32.38% |
| <b>StBTB28</b> | 61.95% | 4.19%  | 2.09% | 31.76% |
| <b>StBTB29</b> | 61.90% | 9.48%  | 4.83% | 23.79% |
| <b>StBTB30</b> | 50.00% | 21.92% | 6.85% | 21.23% |
| <b>StBTB31</b> | 52.63% | 7.02%  | 3.67% | 36.68% |
| <b>StBTB32</b> | 56.42% | 6.25%  | 2.43% | 34.90% |
| <b>StBTB33</b> | 56.17% | 5.74%  | 3.48% | 34.61% |
| <b>StBTB34</b> | 53.42% | 4.66%  | 1.75% | 40.17% |
| <b>StBTB35</b> | 55.29% | 8.67%  | 4.33% | 31.72% |
| <b>StBTB36</b> | 47.56% | 17.07% | 3.66% | 31.71% |
| <b>StBTB37</b> | 50.57% | 8.46%  | 1.79% | 39.19% |
| <b>StBTB38</b> | 51.61% | 6.95%  | 3.97% | 37.47% |
| <b>StBTB39</b> | 42.20% | 16.57% | 2.31% | 38.92% |
| <b>StBTB40</b> | 45.75% | 16.34% | 3.70% | 34.20% |
| <b>StBTB41</b> | 46.05% | 17.38% | 2.93% | 33.63% |
| <b>StBTB42</b> | 54.21% | 7.41%  | 2.86% | 35.52% |
| <b>StBTB43</b> | 56.92% | 6.57%  | 2.94% | 33.56% |
| <b>StBTB44</b> | 56.51% | 5.93%  | 1.15% | 36.41% |
| <b>StBTB45</b> | 58.62% | 8.05%  | 5.08% | 28.25% |
| <b>StBTB46</b> | 39.42% | 15.82% | 4.62% | 40.15% |
| <b>StBTB47</b> | 55.64% | 6.52%  | 1.91% | 35.93% |
| <b>StBTB48</b> | 54.07% | 10.01% | 4.81% | 31.11% |
| <b>StBTB49</b> | 43.01% | 13.79% | 2.54% | 40.65% |
| <b>StBTB50</b> | 48.47% | 12.28% | 3.32% | 35.93% |
| <b>StBTB51</b> | 50.49% | 7.70%  | 2.13% | 39.67% |
| <b>StBTB52</b> | 49.08% | 7.39%  | 4.93% | 38.60% |
| <b>StBTB53</b> | 44.90% | 8.98%  | 5.10% | 41.02% |
| <b>StBTB54</b> | 49.09% | 14.94% | 3.96% | 32.01% |
| <b>StBTB55</b> | 40.20% | 15.93% | 5.39% | 38.48% |
| <b>StBTB56</b> | 43.96% | 14.77% | 2.88% | 38.38% |
| <b>StBTB57</b> | 45.83% | 10.61% | 4.55% | 39.02% |

**Table S3.** GO IDs and names of *StBTBs*.

| <b>Gene</b>          | <b>GO IDs</b>                 | <b>GO Names</b>                                              |
|----------------------|-------------------------------|--------------------------------------------------------------|
| <b><i>StBTB1</i></b> | P:GO:0016567;<br>P:GO:0071472 | P:protein ubiquitination; P:cellular response to salt stress |
| <b><i>StBTB2</i></b> | F:GO:0005515                  | F:protein binding                                            |
| <b><i>StBTB3</i></b> | P:GO:0016567;<br>P:GO:0071472 | P:protein ubiquitination; P:cellular response to salt stress |
| <b><i>StBTB4</i></b> | P:GO:0016567                  | P:protein ubiquitination                                     |

|                       |                                                                                                   |                                                                                                                                                                                                                                                                          |
|-----------------------|---------------------------------------------------------------------------------------------------|--------------------------------------------------------------------------------------------------------------------------------------------------------------------------------------------------------------------------------------------------------------------------|
| <b><i>StBTB5</i></b>  | P:GO:0010114;<br>C:GO:0005634                                                                     | P:response to red light; C:nucleus                                                                                                                                                                                                                                       |
| <b><i>StBTB6</i></b>  | P:GO:0016567                                                                                      | P:protein ubiquitination                                                                                                                                                                                                                                                 |
| <b><i>StBTB7</i></b>  | P:GO:0016567                                                                                      | P:protein ubiquitination                                                                                                                                                                                                                                                 |
| <b><i>StBTB8</i></b>  | P:GO:0016567                                                                                      | P:protein ubiquitination                                                                                                                                                                                                                                                 |
| <b><i>StBTB9</i></b>  | P:GO:0030162;<br>P:GO:0043161;<br>F:GO:0031625;<br>C:GO:0005737                                   | P:regulation of proteolysis; P:proteasome-mediated ubiquitin-dependent protein catabolic process; F:ubiquitin protein ligase binding; C:cytoplasm                                                                                                                        |
| <b><i>StBTB10</i></b> | P:GO:0016567                                                                                      | P:protein ubiquitination                                                                                                                                                                                                                                                 |
| <b><i>StBTB11</i></b> | P:GO:0009862;<br>P:GO:0042742;<br>P:GO:0050832;<br>P:GO:2000022;<br>P:GO:2000031;<br>C:GO:0005634 | P:systemic acquired resistance, salicylic acid mediated signaling pathway; P:defense response to bacterium; P:defense response to fungus; P:regulation of jasmonic acid mediated signaling pathway; P:regulation of salicylic acid mediated signaling pathway; C:nucleus |
| <b><i>StBTB12</i></b> | P:GO:0016567;<br>F:GO:0003755                                                                     | P:protein ubiquitination; F:peptidyl-prolyl cis-trans isomerase activity                                                                                                                                                                                                 |
| <b><i>StBTB13</i></b> | P:GO:0009751;<br>P:GO:0042542;<br>F:GO:0005516;<br>F:GO:0046872                                   | P:response to salicylic acid; P:response to hydrogen peroxide; F:calmodulin binding; F:metal ion binding                                                                                                                                                                 |
| <b><i>StBTB14</i></b> | P:GO:0016567;<br>C:GO:0016020                                                                     | P:protein ubiquitination; C:membrane                                                                                                                                                                                                                                     |
| <b><i>StBTB15</i></b> | P:GO:0016567                                                                                      | P:protein ubiquitination                                                                                                                                                                                                                                                 |
| <b><i>StBTB16</i></b> | P:GO:0016567                                                                                      | P:protein ubiquitination                                                                                                                                                                                                                                                 |
| <b><i>StBTB17</i></b> | P:GO:0016567                                                                                      | P:protein ubiquitination                                                                                                                                                                                                                                                 |
| <b><i>StBTB18</i></b> | P:GO:0009751;<br>P:GO:0042542;<br>F:GO:0005516;<br>F:GO:0046872;<br>C:GO:0005634                  | P:response to salicylic acid; P:response to hydrogen peroxide; F:calmodulin binding; F:metal ion binding; C:nucleus                                                                                                                                                      |
| <b><i>StBTB19</i></b> | P:GO:0006355;<br>P:GO:0009864;<br>P:GO:0099402;<br>F:GO:0000976;<br>C:GO:0005634                  | P:regulation of DNA-templated transcription; P:induced systemic resistance, jasmonic acid mediated signaling pathway; P:plant organ development; F:transcription cis-regulatory region binding; C:nucleus                                                                |
| <b><i>StBTB20</i></b> | F:GO:0005515                                                                                      | F:protein binding                                                                                                                                                                                                                                                        |
| <b><i>StBTB21</i></b> | P:GO:0016567                                                                                      | P:protein ubiquitination                                                                                                                                                                                                                                                 |
| <b><i>StBTB22</i></b> | F:GO:0005515                                                                                      | F:protein binding                                                                                                                                                                                                                                                        |
| <b><i>StBTB23</i></b> | P:GO:0031396;<br>P:GO:0071472;<br>F:GO:0042802;<br>C:GO:0005634;<br>C:GO:0005829                  | P:regulation of protein ubiquitination; P:cellular response to salt stress; F:identical protein binding; C:nucleus; C:cytosol                                                                                                                                            |
| <b><i>StBTB24</i></b> | P:GO:0016567                                                                                      | P:protein ubiquitination                                                                                                                                                                                                                                                 |
| <b><i>StBTB25</i></b> | F:GO:0005515                                                                                      | F:protein binding                                                                                                                                                                                                                                                        |

|                       |                                                                                                                                                                                                                                                                             |                                                                                                                                                                                                                                                                                                                                                                                                                                                                                                                                                                                                                               |
|-----------------------|-----------------------------------------------------------------------------------------------------------------------------------------------------------------------------------------------------------------------------------------------------------------------------|-------------------------------------------------------------------------------------------------------------------------------------------------------------------------------------------------------------------------------------------------------------------------------------------------------------------------------------------------------------------------------------------------------------------------------------------------------------------------------------------------------------------------------------------------------------------------------------------------------------------------------|
| <b><i>StBTB26</i></b> | P:GO:0009751;<br>P:GO:0042542;<br>F:GO:0005516;<br>F:GO:0046872;<br>C:GO:0005634                                                                                                                                                                                            | P:response to salicylic acid; P:response to hydrogen peroxide; F:calmodulin binding; F:metal ion binding; C:nucleus                                                                                                                                                                                                                                                                                                                                                                                                                                                                                                           |
| <b><i>StBTB27</i></b> | P:GO:0009751;<br>P:GO:0042542;<br>F:GO:0005516;<br>F:GO:0046872;<br>C:GO:0005634                                                                                                                                                                                            | P:response to salicylic acid; P:response to hydrogen peroxide; F:calmodulin binding; F:metal ion binding; C:nucleus                                                                                                                                                                                                                                                                                                                                                                                                                                                                                                           |
| <b><i>StBTB28</i></b> | P:GO:0016567                                                                                                                                                                                                                                                                | P:protein ubiquitination                                                                                                                                                                                                                                                                                                                                                                                                                                                                                                                                                                                                      |
| <b><i>StBTB29</i></b> | P:GO:0008285;<br>P:GO:2000104;<br>C:GO:0031261                                                                                                                                                                                                                              | P:negative regulation of cell population proliferation; P:negative regulation of DNA-templated DNA replication; C:DNA replication preinitiation complex                                                                                                                                                                                                                                                                                                                                                                                                                                                                       |
| <b><i>StBTB30</i></b> | P:GO:0042127;<br>P:GO:0048523;<br>C:GO:0005634                                                                                                                                                                                                                              | P:regulation of cell population proliferation; P:negative regulation of cellular process; C:nucleus                                                                                                                                                                                                                                                                                                                                                                                                                                                                                                                           |
| <b><i>StBTB31</i></b> | P:GO:0001666;<br>P:GO:0009408;<br>P:GO:0009611;<br>P:GO:0009625;<br>P:GO:0009682;<br>P:GO:0009862;<br>P:GO:0010112;<br>P:GO:0031348;<br>P:GO:0045893;<br>P:GO:0050832;<br>P:GO:0080027;<br>P:GO:0106167;<br>P:GO:2000022;<br>P:GO:2000031;<br>C:GO:0005737;<br>C:GO:0090575 | P:response to hypoxia; P:response to heat; P:response to wounding; P:response to insect; P:induced systemic resistance; P:systemic acquired resistance, salicylic acid mediated signaling pathway; P:regulation of systemic acquired resistance; P:negative regulation of defense response; P:positive regulation of DNA-templated transcription; P:defense response to fungus; P:response to herbivore; P:extracellular ATP signaling; P:regulation of jasmonic acid mediated signaling pathway; P:regulation of salicylic acid mediated signaling pathway; C:cytoplasm; C:RNA polymerase II transcription regulator complex |
| <b><i>StBTB32</i></b> | P:GO:0009638;<br>P:GO:0009904;<br>P:GO:0016567;<br>C:GO:0005634;<br>C:GO:0005737                                                                                                                                                                                            | P:phototropism; P:chloroplast accumulation movement; P:protein ubiquitination; C:nucleus; C:cytoplasm                                                                                                                                                                                                                                                                                                                                                                                                                                                                                                                         |
| <b><i>StBTB33</i></b> | P:GO:0009862;<br>P:GO:0042742;<br>P:GO:0050832;<br>P:GO:2000022;<br>P:GO:2000031;<br>C:GO:0005634                                                                                                                                                                           | P:systemic acquired resistance, salicylic acid mediated signaling pathway; P:defense response to bacterium; P:defense response to fungus; P:regulation of jasmonic acid mediated signaling pathway; P:regulation of salicylic acid mediated signaling pathway; C:nucleus                                                                                                                                                                                                                                                                                                                                                      |
| <b><i>StBTB34</i></b> | P:GO:0016567                                                                                                                                                                                                                                                                | P:protein ubiquitination                                                                                                                                                                                                                                                                                                                                                                                                                                                                                                                                                                                                      |
| <b><i>StBTB35</i></b> | C:GO:0000151;<br>C:GO:0005737                                                                                                                                                                                                                                               | C:ubiquitin ligase complex; C:cytoplasm                                                                                                                                                                                                                                                                                                                                                                                                                                                                                                                                                                                       |
| <b><i>StBTB36</i></b> | P:GO:0009628                                                                                                                                                                                                                                                                | P:response to abiotic stimulus                                                                                                                                                                                                                                                                                                                                                                                                                                                                                                                                                                                                |
| <b><i>StBTB37</i></b> | P:GO:0016567                                                                                                                                                                                                                                                                | P:protein ubiquitination                                                                                                                                                                                                                                                                                                                                                                                                                                                                                                                                                                                                      |

|                       |                                                                                                                    |                                                                                                                                                                                                              |
|-----------------------|--------------------------------------------------------------------------------------------------------------------|--------------------------------------------------------------------------------------------------------------------------------------------------------------------------------------------------------------|
| <b><i>StBTB38</i></b> | P:GO:0009409;<br>P:GO:0009651;<br>P:GO:0009723;<br>P:GO:0009751;<br>P:GO:0042542;<br>F:GO:0005516;<br>F:GO:0046872 | P:response to cold; P:response to salt stress;<br>P:response to ethylene; P:response to salicylic acid; P:response to hydrogen peroxide;<br>F:calmodulin binding; F:metal ion binding                        |
| <b><i>StBTB39</i></b> | P:GO:0010114;<br>C:GO:0005634                                                                                      | P:response to red light; C:nucleus                                                                                                                                                                           |
| <b><i>StBTB40</i></b> | P:GO:0010114;<br>C:GO:0005634                                                                                      | P:response to red light; C:nucleus                                                                                                                                                                           |
| <b><i>StBTB41</i></b> | P:GO:0010114;<br>C:GO:0005634                                                                                      | P:response to red light; C:nucleus                                                                                                                                                                           |
| <b><i>StBTB42</i></b> | P:GO:0016567                                                                                                       | P:protein ubiquitination                                                                                                                                                                                     |
| <b><i>StBTB43</i></b> | P:GO:0016567;<br>C:GO:0016020                                                                                      | P:protein ubiquitination; C:membrane                                                                                                                                                                         |
| <b><i>StBTB44</i></b> | P:GO:0016567                                                                                                       | P:protein ubiquitination                                                                                                                                                                                     |
| <b><i>StBTB45</i></b> | F:GO:0005515                                                                                                       | F:protein binding                                                                                                                                                                                            |
| <b><i>StBTB46</i></b> | P:GO:0016567;<br>P:GO:0071472                                                                                      | P:protein ubiquitination; P:cellular response to salt stress                                                                                                                                                 |
| <b><i>StBTB47</i></b> | P:GO:0016567                                                                                                       | P:protein ubiquitination                                                                                                                                                                                     |
| <b><i>StBTB48</i></b> | F:GO:0005515                                                                                                       | F:protein binding                                                                                                                                                                                            |
| <b><i>StBTB49</i></b> | P:GO:0010114;<br>C:GO:0005634                                                                                      | P:response to red light; C:nucleus                                                                                                                                                                           |
| <b><i>StBTB50</i></b> | P:GO:0016567                                                                                                       | P:protein ubiquitination                                                                                                                                                                                     |
| <b><i>StBTB51</i></b> | P:GO:0016567                                                                                                       | P:protein ubiquitination                                                                                                                                                                                     |
| <b><i>StBTB52</i></b> | P:GO:0006355;<br>P:GO:0009864;<br>P:GO:0099402;<br>F:GO:0000976;<br>C:GO:0005634                                   | P:regulation of DNA-templated transcription;<br>P:induced systemic resistance, jasmonic acid mediated signaling pathway; P:plant organ development; F:transcription cis-regulatory region binding; C:nucleus |
| <b><i>StBTB53</i></b> | P:GO:0006355;<br>P:GO:0009864;<br>P:GO:0099402;<br>F:GO:0000976;<br>C:GO:0005634                                   | P:regulation of DNA-templated transcription;<br>P:induced systemic resistance, jasmonic acid mediated signaling pathway; P:plant organ development; F:transcription cis-regulatory region binding; C:nucleus |
| <b><i>StBTB54</i></b> | F:GO:0005515                                                                                                       | F:protein binding                                                                                                                                                                                            |
| <b><i>StBTB55</i></b> | P:GO:0016567;<br>P:GO:0071472                                                                                      | P:protein ubiquitination; P:cellular response to salt stress                                                                                                                                                 |
| <b><i>StBTB56</i></b> |                                                                                                                    |                                                                                                                                                                                                              |
| <b><i>StBTB57</i></b> | P:GO:0009628;<br>P:GO:0009751;<br>P:GO:0042542;<br>F:GO:0005516;<br>F:GO:0046872                                   | P:response to abiotic stimulus; P:response to salicylic acid; P:response to hydrogen peroxide;<br>F:calmodulin binding; F:metal ion binding                                                                  |

**Table S4.** miRNAs targeting *StBTBs* and their mode of inhibition.

| <b>miRNA Acc.</b> | <b>Target Acc.</b> | <b>Target_start</b> | <b>Target_end</b> | <b>Inhibition</b> |
|-------------------|--------------------|---------------------|-------------------|-------------------|
| stu-miR162a-5p    | <i>StBTB1</i>      | 929                 | 948               | Cleavage          |
| stu-miR162b-5p    | <i>StBTB1</i>      | 929                 | 948               | Cleavage          |
| stu-miR5303g      | <i>StBTB1</i>      | 735                 | 758               | Cleavage          |
| stu-miR5303i      | <i>StBTB1</i>      | 735                 | 758               | Cleavage          |
| stu-miR5303j      | <i>StBTB1</i>      | 736                 | 759               | Cleavage          |
| stu-miR167a-5p    | <i>StBTB2</i>      | 2446                | 2467              | Translation       |
| stu-miR167b-5p    | <i>StBTB2</i>      | 2446                | 2467              | Translation       |
| stu-miR167c-5p    | <i>StBTB2</i>      | 2446                | 2467              | Translation       |
| stu-miR167d-5p    | <i>StBTB2</i>      | 2446                | 2467              | Translation       |
| stu-miR319a-5p    | <i>StBTB2</i>      | 1379                | 1399              | Cleavage          |
| stu-miR7990b      | <i>StBTB2</i>      | 1659                | 1682              | Cleavage          |
| stu-miR8002-3p    | <i>StBTB2</i>      | 450                 | 473               | Cleavage          |
| stu-miR8035       | <i>StBTB2</i>      | 1839                | 1860              | Cleavage          |
| stu-miR477a-5p    | <i>StBTB3</i>      | 1066                | 1086              | Cleavage          |
| stu-miR5303h      | <i>StBTB3</i>      | 916                 | 939               | Translation       |
| stu-miR8015-3p    | <i>StBTB3</i>      | 618                 | 641               | Cleavage          |
| stu-miR8051-3p    | <i>StBTB3</i>      | 730                 | 750               | Translation       |
| stu-miR172c-5p    | <i>StBTB4</i>      | 150                 | 168               | Translation       |
| stu-miR7981-5p    | <i>StBTB4</i>      | 430                 | 453               | Translation       |
| stu-miR8031       | <i>StBTB4</i>      | 1102                | 1124              | Cleavage          |
| stu-miR160a-5p    | <i>StBTB5</i>      | 1525                | 1545              | Cleavage          |
| stu-miR160b       | <i>StBTB5</i>      | 1525                | 1545              | Cleavage          |
| stu-miR169a-5p    | <i>StBTB5</i>      | 988                 | 1007              | Cleavage          |
| stu-miR169b-5p    | <i>StBTB5</i>      | 988                 | 1007              | Cleavage          |
| stu-miR169c-5p    | <i>StBTB5</i>      | 988                 | 1007              | Cleavage          |
| stu-miR169d-5p    | <i>StBTB5</i>      | 988                 | 1007              | Cleavage          |
| stu-miR169e-5p    | <i>StBTB5</i>      | 988                 | 1007              | Cleavage          |
| stu-miR169f-5p    | <i>StBTB5</i>      | 988                 | 1007              | Cleavage          |
| stu-miR169g       | <i>StBTB5</i>      | 988                 | 1007              | Cleavage          |
| stu-miR169h       | <i>StBTB5</i>      | 988                 | 1007              | Cleavage          |
| stu-miR395a       | <i>StBTB5</i>      | 1321                | 1341              | Cleavage          |
| stu-miR395b       | <i>StBTB5</i>      | 1321                | 1341              | Cleavage          |
| stu-miR395c       | <i>StBTB5</i>      | 1321                | 1341              | Cleavage          |
| stu-miR395d       | <i>StBTB5</i>      | 1321                | 1341              | Cleavage          |
| stu-miR395e       | <i>StBTB5</i>      | 1321                | 1341              | Cleavage          |
| stu-miR395f       | <i>StBTB5</i>      | 1321                | 1341              | Cleavage          |
| stu-miR395g       | <i>StBTB5</i>      | 1321                | 1341              | Cleavage          |
| stu-miR395h       | <i>StBTB5</i>      | 1321                | 1341              | Cleavage          |
| stu-miR395i       | <i>StBTB5</i>      | 1321                | 1341              | Cleavage          |
| stu-miR395j       | <i>StBTB5</i>      | 1321                | 1341              | Cleavage          |
| stu-miR5303f      | <i>StBTB5</i>      | 411                 | 434               | Cleavage          |
| stu-miR8011a-5p   | <i>StBTB5</i>      | 435                 | 458               | Cleavage          |
| stu-miR8035       | <i>StBTB5</i>      | 303                 | 324               | Translation       |
| stu-miR8051-5p    | <i>StBTB5</i>      | 1556                | 1575              | Cleavage          |

|                 |                |      |      |             |
|-----------------|----------------|------|------|-------------|
| stu-miR482b-5p  | <i>StBTB6</i>  | 367  | 387  | Cleavage    |
| stu-miR8029     | <i>StBTB6</i>  | 1634 | 1657 | Cleavage    |
| stu-miR1886g-3p | <i>StBTB7</i>  | 42   | 63   | Translation |
| stu-miR1886h    | <i>StBTB7</i>  | 41   | 64   | Cleavage    |
| stu-miR319a-5p  | <i>StBTB7</i>  | 1355 | 1375 | Translation |
| stu-miR5303h    | <i>StBTB7</i>  | 1134 | 1157 | Cleavage    |
| stu-miR8006-5p  | <i>StBTB7</i>  | 1024 | 1047 | Cleavage    |
| stu-miR8015-3p  | <i>StBTB7</i>  | 1086 | 1109 | Cleavage    |
| stu-miR398b-3p  | <i>StBTB8</i>  | 352  | 372  | Cleavage    |
| stu-miR8028-5p  | <i>StBTB8</i>  | 630  | 653  | Cleavage    |
| stu-miR164-5p   | <i>StBTB9</i>  | 269  | 289  | Cleavage    |
| stu-miR3627-3p  | <i>StBTB10</i> | 256  | 276  | Cleavage    |
| stu-miR5303h    | <i>StBTB10</i> | 459  | 482  | Cleavage    |
| stu-miR172e-5p  | <i>StBTB11</i> | 828  | 848  | Cleavage    |
| stu-miR3627-5p  | <i>StBTB11</i> | 537  | 558  | Cleavage    |
| stu-miR408b-5p  | <i>StBTB11</i> | 1670 | 1690 | Cleavage    |
| stu-miR6024-3p  | <i>StBTB11</i> | 159  | 180  | Cleavage    |
| stu-miR8027     | <i>StBTB11</i> | 256  | 279  | Translation |
| stu-miR319a-5p  | <i>StBTB12</i> | 1074 | 1094 | Cleavage    |
| stu-miR5303g    | <i>StBTB12</i> | 1244 | 1267 | Translation |
| stu-miR5303i    | <i>StBTB12</i> | 1244 | 1267 | Translation |
| stu-miR8036-5p  | <i>StBTB12</i> | 78   | 98   | Cleavage    |
| stu-miR7993a    | <i>StBTB13</i> | 495  | 518  | Cleavage    |
| stu-miR7993b-3p | <i>StBTB13</i> | 495  | 518  | Cleavage    |
| stu-miR7993c    | <i>StBTB13</i> | 495  | 518  | Cleavage    |
| stu-miR7993d    | <i>StBTB13</i> | 495  | 518  | Cleavage    |
| stu-miR8002-5p  | <i>StBTB13</i> | 574  | 596  | Cleavage    |
| stu-miR8014-3p  | <i>StBTB13</i> | 365  | 388  | Translation |
| stu-miR8029     | <i>StBTB13</i> | 401  | 424  | Cleavage    |
| stu-miR171d-3p  | <i>StBTB14</i> | 979  | 999  | Translation |
| stu-miR6149-5p  | <i>StBTB14</i> | 8    | 28   | Cleavage    |
| stu-miR7999-5p  | <i>StBTB14</i> | 737  | 760  | Cleavage    |
| stu-miR8006-5p  | <i>StBTB14</i> | 87   | 110  | Cleavage    |
| stu-miR172b-5p  | <i>StBTB15</i> | 396  | 416  | Translation |
| stu-miR398b-3p  | <i>StBTB15</i> | 593  | 613  | Cleavage    |
| stu-miR482e-5p  | <i>StBTB15</i> | 1597 | 1617 | Cleavage    |
| stu-miR530      | <i>StBTB15</i> | 81   | 101  | Cleavage    |
| stu-miR6024-3p  | <i>StBTB15</i> | 1127 | 1147 | Translation |
| stu-miR8019-5p  | <i>StBTB15</i> | 9    | 31   | Translation |
| stu-miR8029     | <i>StBTB15</i> | 815  | 838  | Cleavage    |
| stu-miR8019-5p  | <i>StBTB16</i> | 9    | 31   | Translation |
| stu-miR319a-5p  | <i>StBTB17</i> | 1355 | 1375 | Translation |
| stu-miR1886g-5p | <i>StBTB18</i> | 250  | 273  | Cleavage    |
| stu-miR1919-5p  | <i>StBTB18</i> | 756  | 776  | Cleavage    |
| stu-miR7980a    | <i>StBTB18</i> | 252  | 275  | Translation |
| stu-miR8017     | <i>StBTB18</i> | 358  | 381  | Cleavage    |
| stu-miR1886g-5p | <i>StBTB19</i> | 1194 | 1217 | Cleavage    |
| stu-miR319a-3p  | <i>StBTB19</i> | 174  | 194  | Translation |



|                 |                |      |      |             |
|-----------------|----------------|------|------|-------------|
| stu-miR319b     | <i>StBTB19</i> | 175  | 194  | Translation |
| stu-miR397-5p   | <i>StBTB19</i> | 397  | 417  | Cleavage    |
| stu-miR7122-3p  | <i>StBTB19</i> | 355  | 375  | Cleavage    |
| stu-miR8002-3p  | <i>StBTB19</i> | 278  | 301  | Cleavage    |
| stu-miR171d-3p  | <i>StBTB20</i> | 2104 | 2124 | Cleavage    |
| stu-miR408a-3p  | <i>StBTB20</i> | 80   | 99   | Cleavage    |
| stu-miR479      | <i>StBTB20</i> | 2103 | 2123 | Cleavage    |
| stu-miR7980a    | <i>StBTB20</i> | 1469 | 1492 | Cleavage    |
| stu-miR8005b-5p | <i>StBTB20</i> | 57   | 80   | Cleavage    |
| stu-miR8036-5p  | <i>StBTB20</i> | 94   | 114  | Cleavage    |
| stu-miR164-3p   | <i>StBTB21</i> | 1118 | 1138 | Cleavage    |
| stu-miR172a-3p  | <i>StBTB21</i> | 1080 | 1100 | Cleavage    |
| stu-miR172b-3p  | <i>StBTB21</i> | 1080 | 1100 | Cleavage    |
| stu-miR172c-3p  | <i>StBTB21</i> | 1082 | 1100 | Cleavage    |
| stu-miR172e-3p  | <i>StBTB21</i> | 1080 | 1100 | Cleavage    |
| stu-miR390-3p   | <i>StBTB21</i> | 1386 | 1406 | Cleavage    |
| stu-miR5303j    | <i>StBTB21</i> | 928  | 951  | Translation |
| stu-miR7993a    | <i>StBTB21</i> | 795  | 818  | Cleavage    |
| stu-miR7993b-3p | <i>StBTB21</i> | 795  | 818  | Cleavage    |
| stu-miR7993c    | <i>StBTB21</i> | 795  | 818  | Cleavage    |
| stu-miR7993d    | <i>StBTB21</i> | 795  | 818  | Cleavage    |
| stu-miR827-5p   | <i>StBTB21</i> | 1179 | 1199 | Cleavage    |
| stu-miR156f-5p  | <i>StBTB22</i> | 324  | 343  | Cleavage    |
| stu-miR6024-3p  | <i>StBTB22</i> | 274  | 295  | Cleavage    |
| stu-miR8022     | <i>StBTB22</i> | 720  | 743  | Translation |
| stu-miR8036-3p  | <i>StBTB22</i> | 481  | 502  | Cleavage    |
| stu-miR8036-3p  | <i>StBTB22</i> | 610  | 631  | Cleavage    |
| stu-miR8037     | <i>StBTB22</i> | 160  | 181  | Translation |
| stu-miR8048-5p  | <i>StBTB22</i> | 43   | 63   | Cleavage    |
| stu-miR172a-5p  | <i>StBTB23</i> | 565  | 584  | Cleavage    |
| stu-miR1886g-3p | <i>StBTB23</i> | 894  | 915  | Cleavage    |
| stu-miR1886i-3p | <i>StBTB23</i> | 892  | 914  | Cleavage    |
| stu-miR8005a    | <i>StBTB23</i> | 345  | 368  | Cleavage    |
| stu-miR8005b-3p | <i>StBTB23</i> | 345  | 368  | Cleavage    |
| stu-miR8005b-5p | <i>StBTB23</i> | 354  | 377  | Cleavage    |
| stu-miR8005c    | <i>StBTB23</i> | 345  | 368  | Cleavage    |
| stu-miR8011b-5p | <i>StBTB23</i> | 876  | 897  | Cleavage    |
| stu-miR384-5p   | <i>StBTB24</i> | 905  | 924  | Cleavage    |
| stu-miR1886a    | <i>StBTB26</i> | 383  | 406  | Cleavage    |
| stu-miR1886b    | <i>StBTB26</i> | 383  | 406  | Cleavage    |
| stu-miR1886c    | <i>StBTB26</i> | 383  | 406  | Cleavage    |
| stu-miR1886d    | <i>StBTB26</i> | 383  | 406  | Cleavage    |
| stu-miR1886e    | <i>StBTB26</i> | 383  | 406  | Cleavage    |
| stu-miR1886f    | <i>StBTB26</i> | 383  | 406  | Cleavage    |
| stu-miR396-5p   | <i>StBTB26</i> | 454  | 474  | Cleavage    |
| stu-miR7987     | <i>StBTB26</i> | 639  | 662  | Translation |
| stu-miR8005a    | <i>StBTB26</i> | 510  | 533  | Translation |
| stu-miR8005b-3p | <i>StBTB26</i> | 510  | 533  | Translation |

|                 |                |      |      |             |
|-----------------|----------------|------|------|-------------|
| stu-miR8005c    | <i>StBTB26</i> | 510  | 533  | Translation |
| stu-miR396-5p   | <i>StBTB27</i> | 454  | 474  | Cleavage    |
| stu-miR6024-3p  | <i>StBTB27</i> | 674  | 695  | Cleavage    |
| stu-miR172c-5p  | <i>StBTB28</i> | 150  | 168  | Translation |
| stu-miR8031     | <i>StBTB28</i> | 1102 | 1124 | Cleavage    |
| stu-miR8047     | <i>StBTB28</i> | 348  | 368  | Translation |
| stu-miR171b-5p  | <i>StBTB29</i> | 483  | 503  | Translation |
| stu-miR477a-3p  | <i>StBTB29</i> | 326  | 347  | Cleavage    |
| stu-miR7122-3p  | <i>StBTB29</i> | 453  | 473  | Cleavage    |
| stu-miR8002-3p  | <i>StBTB29</i> | 918  | 941  | Cleavage    |
| stu-miR8014-5p  | <i>StBTB29</i> | 255  | 278  | Cleavage    |
| stu-miR8030-5p  | <i>StBTB29</i> | 1583 | 1605 | Cleavage    |
| stu-miR8033-3p  | <i>StBTB29</i> | 717  | 738  | Translation |
| stu-miR827-3p   | <i>StBTB29</i> | 1301 | 1321 | Cleavage    |
| stu-miR827-3p   | <i>StBTB30</i> | 302  | 322  | Cleavage    |
| stu-miR156d-3p  | <i>StBTB31</i> | 1686 | 1707 | Cleavage    |
| stu-miR172e-5p  | <i>StBTB31</i> | 792  | 812  | Cleavage    |
| stu-miR8003     | <i>StBTB31</i> | 354  | 377  | Cleavage    |
| stu-miR8015-3p  | <i>StBTB31</i> | 1248 | 1271 | Cleavage    |
| stu-miR8024a-3p | <i>StBTB31</i> | 905  | 928  | Cleavage    |
| stu-miR8024b    | <i>StBTB31</i> | 905  | 928  | Cleavage    |
| stu-miR172c-5p  | <i>StBTB32</i> | 1047 | 1065 | Cleavage    |
| stu-miR172e-5p  | <i>StBTB32</i> | 1662 | 1682 | Translation |
| stu-miR5303a    | <i>StBTB32</i> | 1276 | 1299 | Cleavage    |
| stu-miR5303b    | <i>StBTB32</i> | 1276 | 1299 | Cleavage    |
| stu-miR5303c    | <i>StBTB32</i> | 1276 | 1299 | Cleavage    |
| stu-miR5303d    | <i>StBTB32</i> | 1276 | 1299 | Cleavage    |
| stu-miR5303e    | <i>StBTB32</i> | 1276 | 1299 | Cleavage    |
| stu-miR7993a    | <i>StBTB32</i> | 561  | 584  | Cleavage    |
| stu-miR7993b-3p | <i>StBTB32</i> | 561  | 584  | Cleavage    |
| stu-miR7993c    | <i>StBTB32</i> | 561  | 584  | Cleavage    |
| stu-miR7993d    | <i>StBTB32</i> | 561  | 584  | Cleavage    |
| stu-miR8044-3p  | <i>StBTB32</i> | 210  | 230  | Cleavage    |
| stu-miR172a-5p  | <i>StBTB33</i> | 853  | 872  | Translation |
| stu-miR5303f    | <i>StBTB33</i> | 1674 | 1697 | Cleavage    |
| stu-miR7990a    | <i>StBTB33</i> | 72   | 95   | Cleavage    |
| stu-miR7990a    | <i>StBTB33</i> | 1234 | 1257 | Translation |
| stu-miR7993b-5p | <i>StBTB33</i> | 93   | 116  | Cleavage    |
| stu-miR8006-5p  | <i>StBTB33</i> | 1676 | 1699 | Cleavage    |
| stu-miR5303h    | <i>StBTB34</i> | 1502 | 1525 | Translation |
| stu-miR5303j    | <i>StBTB34</i> | 1502 | 1525 | Translation |
| stu-miR6023     | <i>StBTB34</i> | 81   | 101  | Translation |
| stu-miR7980a    | <i>StBTB34</i> | 1079 | 1102 | Cleavage    |
| stu-miR7992-3p  | <i>StBTB34</i> | 1206 | 1228 | Cleavage    |
| stu-miR827-3p   | <i>StBTB34</i> | 1206 | 1225 | Cleavage    |
| stu-miR166d-5p  | <i>StBTB35</i> | 3    | 23   | Cleavage    |
| stu-miR397-5p   | <i>StBTB35</i> | 278  | 297  | Cleavage    |
| stu-miR399a-5p  | <i>StBTB35</i> | 222  | 242  | Cleavage    |

|                 |                |      |      |             |
|-----------------|----------------|------|------|-------------|
| stu-miR399b-5p  | <i>StBTB35</i> | 222  | 242  | Cleavage    |
| stu-miR399c-5p  | <i>StBTB35</i> | 222  | 242  | Cleavage    |
| stu-miR399d-5p  | <i>StBTB35</i> | 222  | 242  | Cleavage    |
| stu-miR399e-5p  | <i>StBTB35</i> | 222  | 242  | Cleavage    |
| stu-miR399f-5p  | <i>StBTB35</i> | 222  | 242  | Cleavage    |
| stu-miR399g-5p  | <i>StBTB35</i> | 222  | 242  | Cleavage    |
| stu-miR399h     | <i>StBTB35</i> | 222  | 242  | Cleavage    |
| stu-miR399j-5p  | <i>StBTB35</i> | 222  | 242  | Cleavage    |
| stu-miR399k-5p  | <i>StBTB35</i> | 222  | 242  | Cleavage    |
| stu-miR399l-5p  | <i>StBTB35</i> | 222  | 242  | Cleavage    |
| stu-miR399m-5p  | <i>StBTB35</i> | 222  | 242  | Cleavage    |
| stu-miR399n-5p  | <i>StBTB35</i> | 222  | 242  | Cleavage    |
| stu-miR399o-5p  | <i>StBTB35</i> | 222  | 242  | Cleavage    |
| stu-miR477a-3p  | <i>StBTB35</i> | 1160 | 1181 | Cleavage    |
| stu-miR5303a    | <i>StBTB35</i> | 1090 | 1113 | Cleavage    |
| stu-miR5303b    | <i>StBTB35</i> | 1090 | 1113 | Cleavage    |
| stu-miR5303c    | <i>StBTB35</i> | 1090 | 1113 | Cleavage    |
| stu-miR5303d    | <i>StBTB35</i> | 1090 | 1113 | Cleavage    |
| stu-miR5303e    | <i>StBTB35</i> | 698  | 721  | Translation |
| stu-miR5303g    | <i>StBTB35</i> | 757  | 780  | Translation |
| stu-miR5303i    | <i>StBTB35</i> | 757  | 780  | Translation |
| stu-miR5303j    | <i>StBTB35</i> | 758  | 781  | Cleavage    |
| stu-miR7986     | <i>StBTB35</i> | 1547 | 1570 | Cleavage    |
| stu-miR8001b-5p | <i>StBTB36</i> | 16   | 39   | Cleavage    |
| stu-miR319a-5p  | <i>StBTB37</i> | 344  | 364  | Cleavage    |
| stu-miR6025     | <i>StBTB37</i> | 88   | 109  | Translation |
| stu-miR7980a    | <i>StBTB37</i> | 1109 | 1132 | Cleavage    |
| stu-miR8001b-3p | <i>StBTB37</i> | 581  | 604  | Translation |
| stu-miR8017     | <i>StBTB37</i> | 1494 | 1517 | Cleavage    |
| stu-miR8051-3p  | <i>StBTB37</i> | 632  | 651  | Cleavage    |
| stu-miR5303a    | <i>StBTB38</i> | 92   | 115  | Cleavage    |
| stu-miR5303b    | <i>StBTB38</i> | 92   | 115  | Cleavage    |
| stu-miR5303c    | <i>StBTB38</i> | 92   | 115  | Cleavage    |
| stu-miR5303d    | <i>StBTB38</i> | 92   | 115  | Cleavage    |
| stu-miR5303f    | <i>StBTB38</i> | 94   | 117  | Cleavage    |
| stu-miR5303h    | <i>StBTB38</i> | 244  | 267  | Cleavage    |
| stu-miR7984c-3p | <i>StBTB38</i> | 93   | 116  | Cleavage    |
| stu-miR8045     | <i>StBTB38</i> | 18   | 38   | Cleavage    |
| stu-miR171a-3p  | <i>StBTB39</i> | 1043 | 1063 | Translation |
| stu-miR171c-3p  | <i>StBTB39</i> | 1043 | 1063 | Translation |
| stu-miR171e     | <i>StBTB39</i> | 1043 | 1063 | Translation |
| stu-miR1886i-3p | <i>StBTB39</i> | 193  | 215  | Cleavage    |
| stu-miR319a-3p  | <i>StBTB39</i> | 1370 | 1390 | Translation |
| stu-miR319b     | <i>StBTB39</i> | 1371 | 1390 | Translation |
| stu-miR8029     | <i>StBTB39</i> | 131  | 154  | Cleavage    |
| stu-miR8046-5p  | <i>StBTB39</i> | 1271 | 1291 | Translation |
| stu-miR1886g-5p | <i>StBTB41</i> | 521  | 544  | Cleavage    |
| stu-miR7980a    | <i>StBTB41</i> | 523  | 546  | Translation |

|                 |                |      |      |             |
|-----------------|----------------|------|------|-------------|
| stu-miR8047     | <i>StBTB41</i> | 509  | 529  | Cleavage    |
| stu-miR169f-3p  | <i>StBTB43</i> | 471  | 489  | Cleavage    |
| stu-miR5303j    | <i>StBTB43</i> | 1204 | 1227 | Translation |
| stu-miR6022     | <i>StBTB43</i> | 392  | 412  | Cleavage    |
| stu-miR7980a    | <i>StBTB43</i> | 169  | 192  | Translation |
| stu-miR7983-5p  | <i>StBTB43</i> | 44   | 67   | Cleavage    |
| stu-miR8019-3p  | <i>StBTB43</i> | 943  | 966  | Cleavage    |
| stu-miR8019-5p  | <i>StBTB43</i> | 408  | 430  | Cleavage    |
| stu-miR8044-3p  | <i>StBTB43</i> | 42   | 62   | Cleavage    |
| stu-miR384-5p   | <i>StBTB44</i> | 941  | 960  | Cleavage    |
| stu-miR8042     | <i>StBTB44</i> | 1099 | 1119 | Cleavage    |
| stu-miR156d-3p  | <i>StBTB45</i> | 467  | 487  | Cleavage    |
| stu-miR477a-3p  | <i>StBTB45</i> | 830  | 851  | Cleavage    |
| stu-miR8014-3p  | <i>StBTB45</i> | 1974 | 1997 | Cleavage    |
| stu-miR8014-5p  | <i>StBTB45</i> | 759  | 782  | Cleavage    |
| stu-miR8033-3p  | <i>StBTB45</i> | 1221 | 1242 | Translation |
| stu-miR827-3p   | <i>StBTB45</i> | 1805 | 1825 | Cleavage    |
| stu-miR171d-5p  | <i>StBTB46</i> | 984  | 1004 | Cleavage    |
| stu-miR7993a    | <i>StBTB47</i> | 303  | 326  | Cleavage    |
| stu-miR7993b-3p | <i>StBTB47</i> | 303  | 326  | Cleavage    |
| stu-miR7993c    | <i>StBTB47</i> | 303  | 326  | Cleavage    |
| stu-miR7993d    | <i>StBTB47</i> | 303  | 326  | Cleavage    |
| stu-miR160a-3p  | <i>StBTB48</i> | 917  | 937  | Cleavage    |
| stu-miR171a-5p  | <i>StBTB48</i> | 1870 | 1890 | Cleavage    |
| stu-miR171c-5p  | <i>StBTB48</i> | 1870 | 1890 | Cleavage    |
| stu-miR1886g-5p | <i>StBTB48</i> | 1593 | 1616 | Cleavage    |
| stu-miR5303g    | <i>StBTB48</i> | 806  | 828  | Translation |
| stu-miR5303i    | <i>StBTB48</i> | 806  | 828  | Translation |
| stu-miR7980b-3p | <i>StBTB48</i> | 1593 | 1616 | Cleavage    |
| stu-miR7984b-3p | <i>StBTB48</i> | 440  | 463  | Cleavage    |
| stu-miR8035     | <i>StBTB49</i> | 300  | 321  | Translation |
| stu-miR6149-3p  | <i>StBTB50</i> | 15   | 36   | Cleavage    |
| stu-miR7992-3p  | <i>StBTB50</i> | 2187 | 2209 | Cleavage    |
| stu-miR8005a    | <i>StBTB50</i> | 732  | 755  | Cleavage    |
| stu-miR8005b-3p | <i>StBTB50</i> | 732  | 755  | Cleavage    |
| stu-miR8005c    | <i>StBTB50</i> | 732  | 755  | Cleavage    |
| stu-miR8048-5p  | <i>StBTB50</i> | 184  | 204  | Cleavage    |
| stu-miR397-5p   | <i>StBTB52</i> | 403  | 423  | Cleavage    |
| stu-miR7122-3p  | <i>StBTB52</i> | 361  | 381  | Cleavage    |
| stu-miR7996a    | <i>StBTB52</i> | 319  | 342  | Translation |
| stu-miR7996b    | <i>StBTB52</i> | 319  | 342  | Translation |
| stu-miR7996c    | <i>StBTB52</i> | 319  | 342  | Translation |
| stu-miR8002-5p  | <i>StBTB52</i> | 633  | 656  | Cleavage    |
| stu-miR8016     | <i>StBTB52</i> | 139  | 162  | Cleavage    |
| stu-miR172a-3p  | <i>StBTB53</i> | 1441 | 1461 | Cleavage    |
| stu-miR172b-3p  | <i>StBTB53</i> | 1441 | 1461 | Cleavage    |
| stu-miR172c-3p  | <i>StBTB53</i> | 1443 | 1461 | Cleavage    |
| stu-miR172d-3p  | <i>StBTB53</i> | 1441 | 1461 | Cleavage    |

|                 |                |      |      |             |
|-----------------|----------------|------|------|-------------|
| stu-miR172e-3p  | <i>StBTB53</i> | 1441 | 1461 | Cleavage    |
| stu-miR397-5p   | <i>StBTB53</i> | 412  | 432  | Cleavage    |
| stu-miR5304-3p  | <i>StBTB53</i> | 1437 | 1457 | Cleavage    |
| stu-miR7996a    | <i>StBTB53</i> | 328  | 351  | Translation |
| stu-miR7996b    | <i>StBTB53</i> | 328  | 351  | Translation |
| stu-miR7996c    | <i>StBTB53</i> | 328  | 351  | Translation |
| stu-miR8016     | <i>StBTB53</i> | 1093 | 1116 | Cleavage    |
| stu-miR8011a-5p | <i>StBTB54</i> | 236  | 259  | Cleavage    |
| stu-miR393-3p   | <i>StBTB55</i> | 898  | 918  | Cleavage    |
| stu-miR408a-3p  | <i>StBTB55</i> | 896  | 916  | Cleavage    |
| stu-miR5303g    | <i>StBTB55</i> | 576  | 599  | Cleavage    |
| stu-miR5303i    | <i>StBTB55</i> | 576  | 599  | Cleavage    |
| stu-miR5303j    | <i>StBTB55</i> | 577  | 600  | Translation |
| stu-miR7990a    | <i>StBTB55</i> | 447  | 470  | Cleavage    |
| stu-miR8044-3p  | <i>StBTB55</i> | 615  | 635  | Cleavage    |
| stu-miR8051-5p  | <i>StBTB55</i> | 1028 | 1047 | Cleavage    |
| stu-miR477a-3p  | <i>StBTB56</i> | 755  | 776  | Translation |
| stu-miR7994a    | <i>StBTB56</i> | 1587 | 1610 | Cleavage    |
| stu-miR7994b-3p | <i>StBTB56</i> | 1587 | 1610 | Cleavage    |
| stu-miR7997a    | <i>StBTB56</i> | 523  | 543  | Translation |
| stu-miR7997b    | <i>StBTB56</i> | 523  | 543  | Translation |
| stu-miR8038a-5p | <i>StBTB56</i> | 1319 | 1340 | Cleavage    |
| stu-miR8038b-5p | <i>StBTB56</i> | 1319 | 1340 | Cleavage    |
| stu-miR156f-3p  | <i>StBTB57</i> | 477  | 497  | Cleavage    |

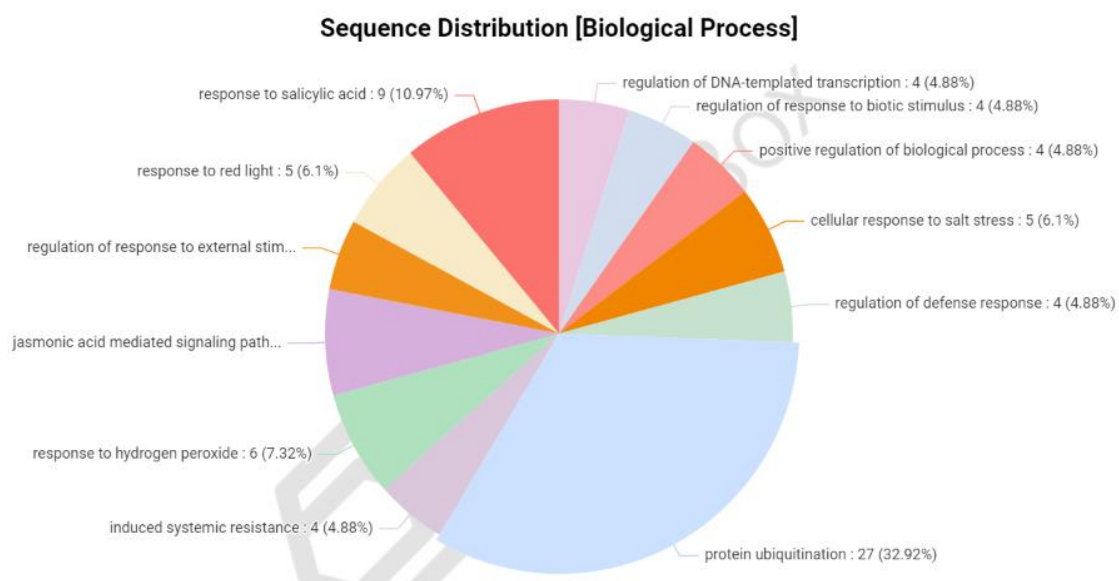

**Figure S1.** Pie chart depicting biological process sequence distribution of *StBTBs*.

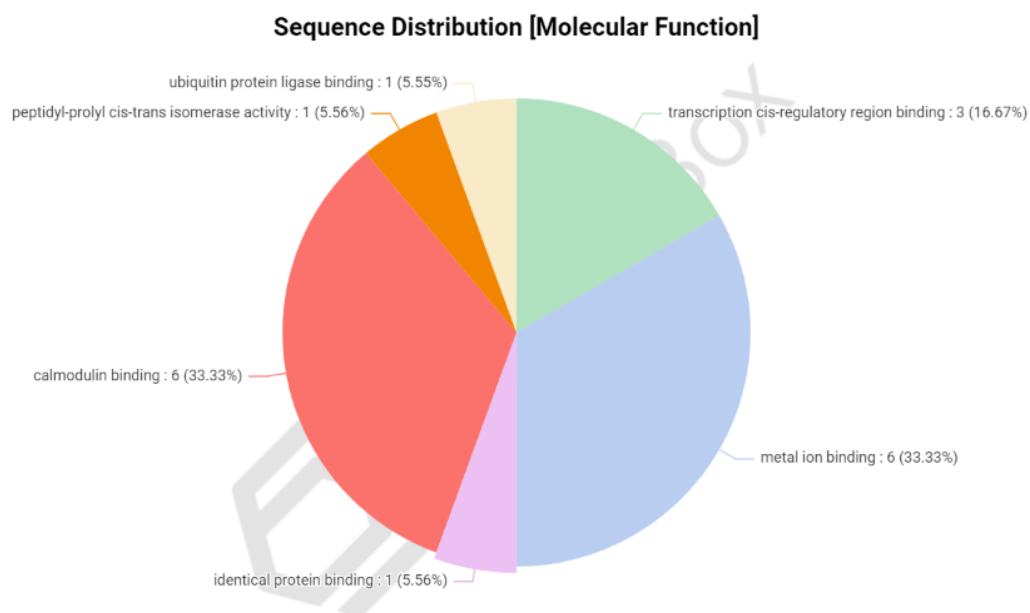

**Figure S2.** Pie chart depicting molecular function sequence distribution of *StBTBs*.

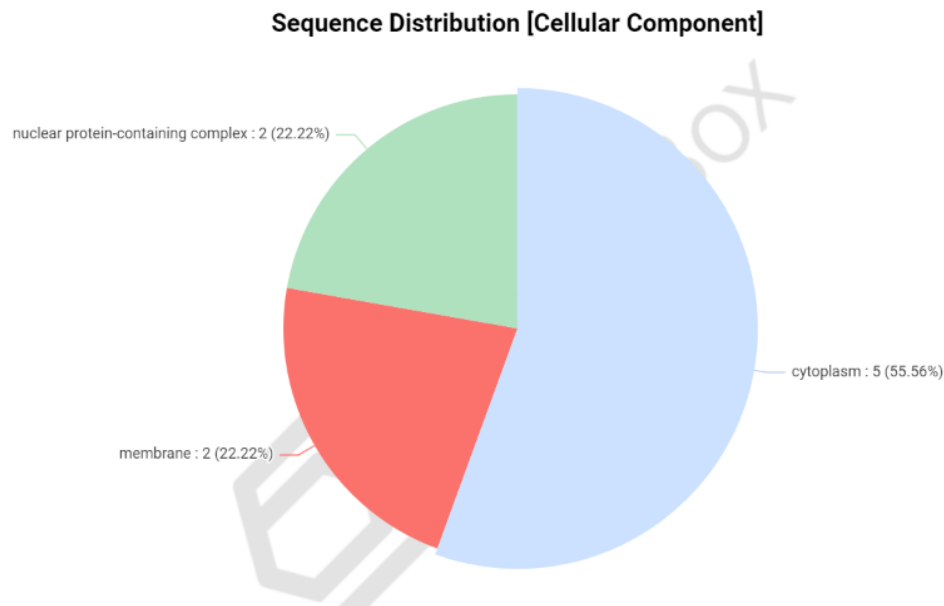

**Figure S3.** Pie chart depicting cellular component sequence distribution of *StBTBs*.
